# Supplementary material for: Tumor suppressor KIF1Bβ regulates mitochondrial apoptosis in collaboration with YME1L1
Source: PubMed Central journal article supplement — Mol Carcinog. 2019 Mar 11;58(7):1134–44. doi: 10.1002/mc.22997 (PMC6593999; doi:10.1002/mc.22997), 2019-03-11
Supplement: MC-58-1134-s001.pdf [file MC-58-1134-s001.pdf]

Incubation period after CCCP addition (min)

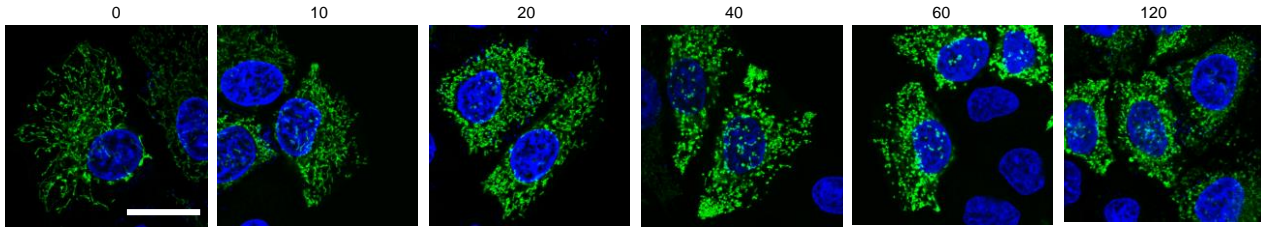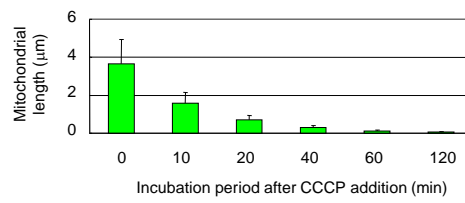

**Fig. S1. Measurement of morphological changes in mitochondria.**

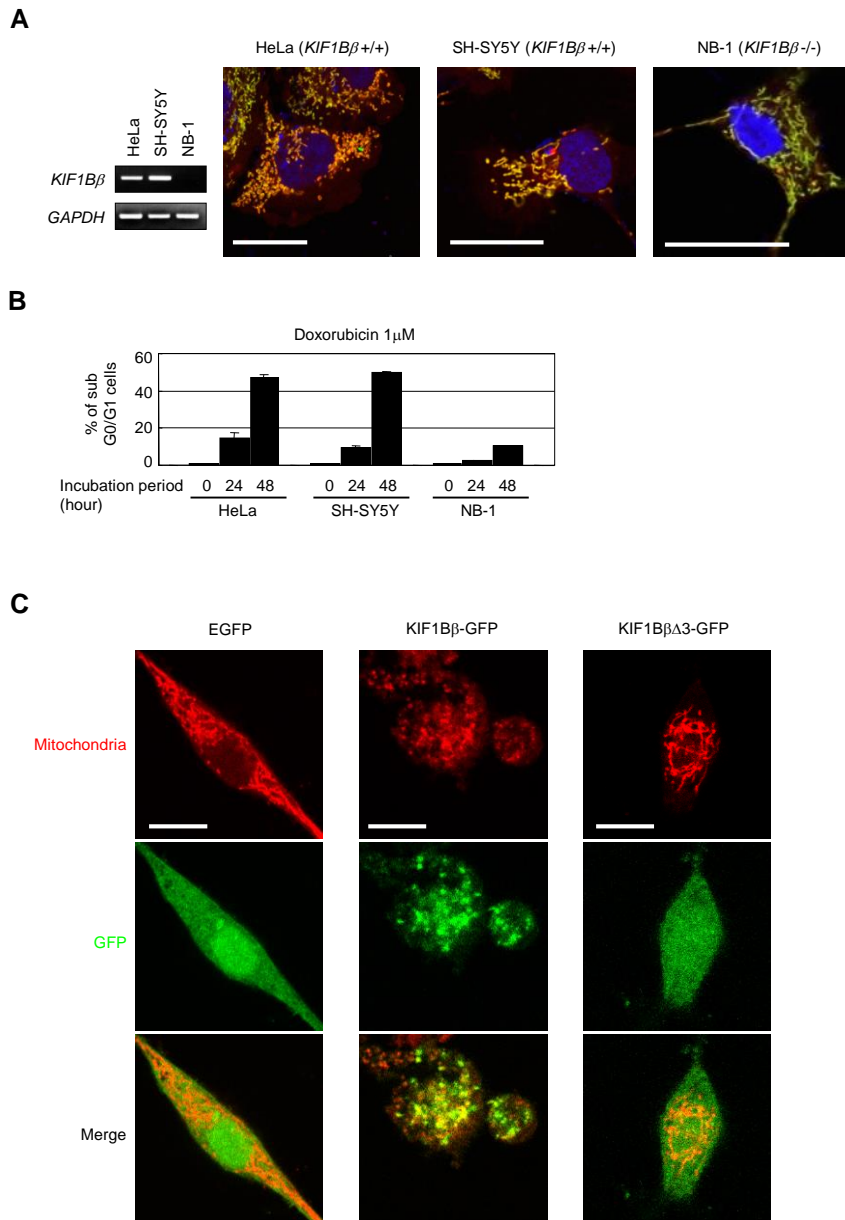

**Fig. S2. *KIF1B* $\beta$ -deficient NB-1 cell line yields spontaneous mitochondrial fusion.**

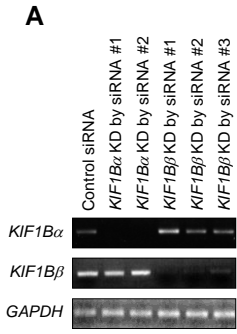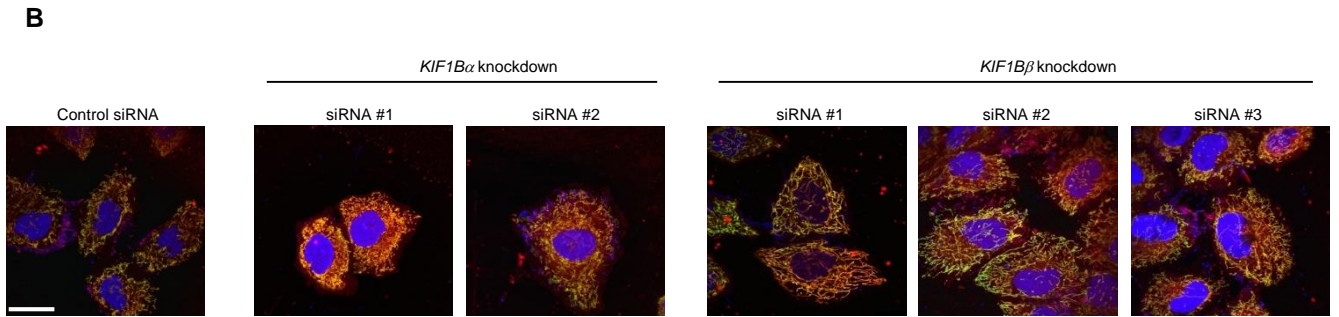

**Fig. S3. Knockdown of KIF1B $\beta$  enhances mitochondrial fusion in HeLa cells.**

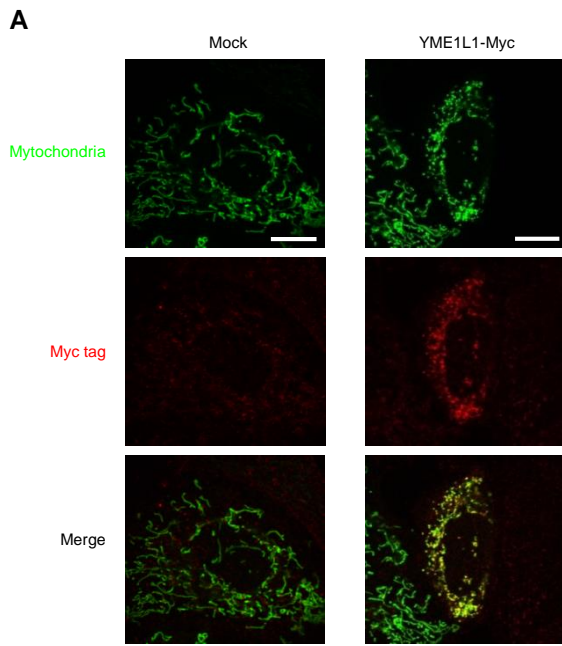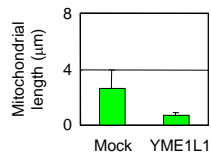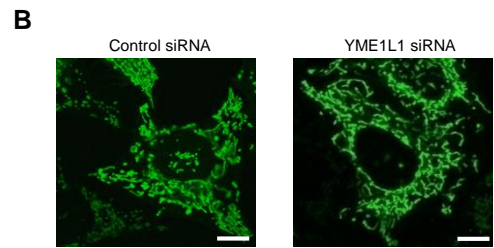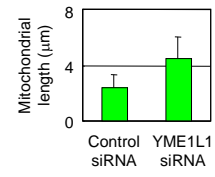

**Fig. S4. Mitochondrial metalloprotease YME1L1 regulates mitochondrial fragmentation.**

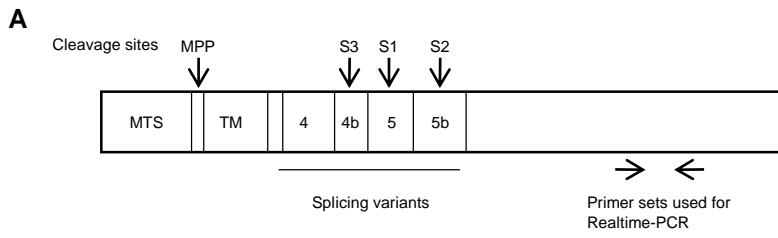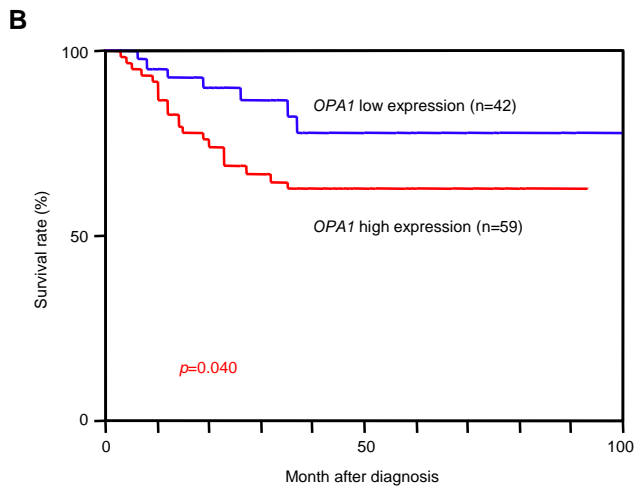

**Fig. S5. *OPA1* expression in neuroblastomas.**
